# Supplementary material for: Increasing maternal age associates with lower placental CPT1B mRNA expression and acylcarnitines, particularly in overweight women
Source: Frontiers journal article supplement (doi:10.3389/fphys.2023.1166827), 2023-05-18

## Supplementary information

### Supplementary methods

Chromatography was performed using a 2.1 x 100 mm 1.8  $\mu$ m Zorbax Eclipse Plus C18 RRHD (Agilent Technologies) column at 60°C, and the following gradients and settings: Mobile phase A: 50% water, 30% acetonitrile, 20% isopropanol, 10 mmol/L ammonium formate and Mobile phase B: 90% isopropanol, 9% acetonitrile, 1% water, 10 mmol/L ammonium formate; Start (0.4 ml/min): 90% A, 0-2.7 minutes: decrease to 55% A, 2.7-2.8 minutes: decrease to 47% A, 2.8-9 minutes: decrease to 35% A, 9-9.1 minutes: decrease to 11% A, 9.1-11 minutes: decrease to 8% A, 11-11.1 minutes: decrease to 0% A, 11.1-11.9 minutes: 0% A, 11.9-12 minutes: Increase to 90% A, 12-15 minutes: 90% A. The Agilent 6490 triple quadrupole was run with the following settings - Gas temperature: 150 °C; gas flow: 17 L/min; nebulizer: 20 psi; sheath gas temperature: 200°C; sheath gas flow: 10 L/min; positive capillary voltage: 3500 V; negative capillary voltage: 3000 V; positive nozzle voltage: 1000 V; negative nozzle voltage: 1500 V; positive high pressure RF (iFunnel): 100 V; negative high pressure RF (iFunnel): 90 V; positive low pressure RF (iFunnel): 100 V; negative low pressure RF (iFunnel): 60 V; fragmentor: 380; polarity: positive. Acylcarnitines were measured using the transitions shown in Supplementary table 1.

**Supplementary Table 1. Transitions used for the measurement of placental acylcarnitines.**

| <b>Name</b>                                  | <b>Retention time<br/>(min)</b> | <b>Collision Energy</b> | <b>Precursor Ion<br/>(m/z)</b> | <b>Product Ion<br/>(m/z)</b> |
|----------------------------------------------|---------------------------------|-------------------------|--------------------------------|------------------------------|
| AcylCarnitine 12:0                           | 1.3                             | 30                      | 344.3                          | 85.1                         |
| AcylCarnitine 13:0                           | 1.7                             | 30                      | 358.3                          | 85.1                         |
| AcylCarnitine 14:0                           | 2.0                             | 30                      | 372.3                          | 85.1                         |
| AcylCarnitine 14:1                           | 1.5                             | 30                      | 370.3                          | 85.1                         |
| AcylCarnitine 14:2                           | 1.2                             | 30                      | 368.3                          | 85.1                         |
| AcylCarnitine 15:0                           | 2.3                             | 30                      | 386.3                          | 85.1                         |
| AcylCarnitine 16:0                           | 2.5                             | 30                      | 400.4                          | 85.1                         |
| AcylCarnitine 16:0 d3<br>(Internal standard) | 2.5                             | 30                      | 403.3                          | 85.1                         |
| AcylCarnitine 16:1                           | 2.2                             | 30                      | 398.3                          | 85.1                         |
| AcylCarnitine 17:0                           | 2.9                             | 30                      | 414.4                          | 85.1                         |
| AcylCarnitine 18:0                           | 3.6                             | 30                      | 428.4                          | 85.1                         |
| AcylCarnitine 18:1                           | 2.7                             | 30                      | 426.4                          | 85.1                         |
| AcylCarnitine 18:2                           | 2.2                             | 30                      | 424.3                          | 85.1                         |
| AcylCarnitine 20:4                           | 2.3                             | 30                      | 448.4                          | 85.1                         |
| AcylCarnitine 22:6                           | 3.6                             | 30                      | 472.4                          | 85.1                         |

**Supplementary Figure 1. Associations between abundance of placental acylcarnitines with placental *CPT1B* mRNA expression or maternal age by linear regression stratified by maternal GDM status. The forest plots show coefficient estimates and 95% confidence intervals of associations between placental acylcarnitines (outcome) with placental *CPT1B* mRNA expression (A) or maternal age (years, B) in subjects with normoglycemia (n=26) and GDM (n=24). Filled symbols show acylcarnitines that are significantly associated after adjustment by Benjamini-Hochberg's correction. Data for placental acylcarnitine abundance and mRNA expression data of *CPT1B* were log<sub>2</sub>-transformed then converted to Z-scores prior to linear regression.**

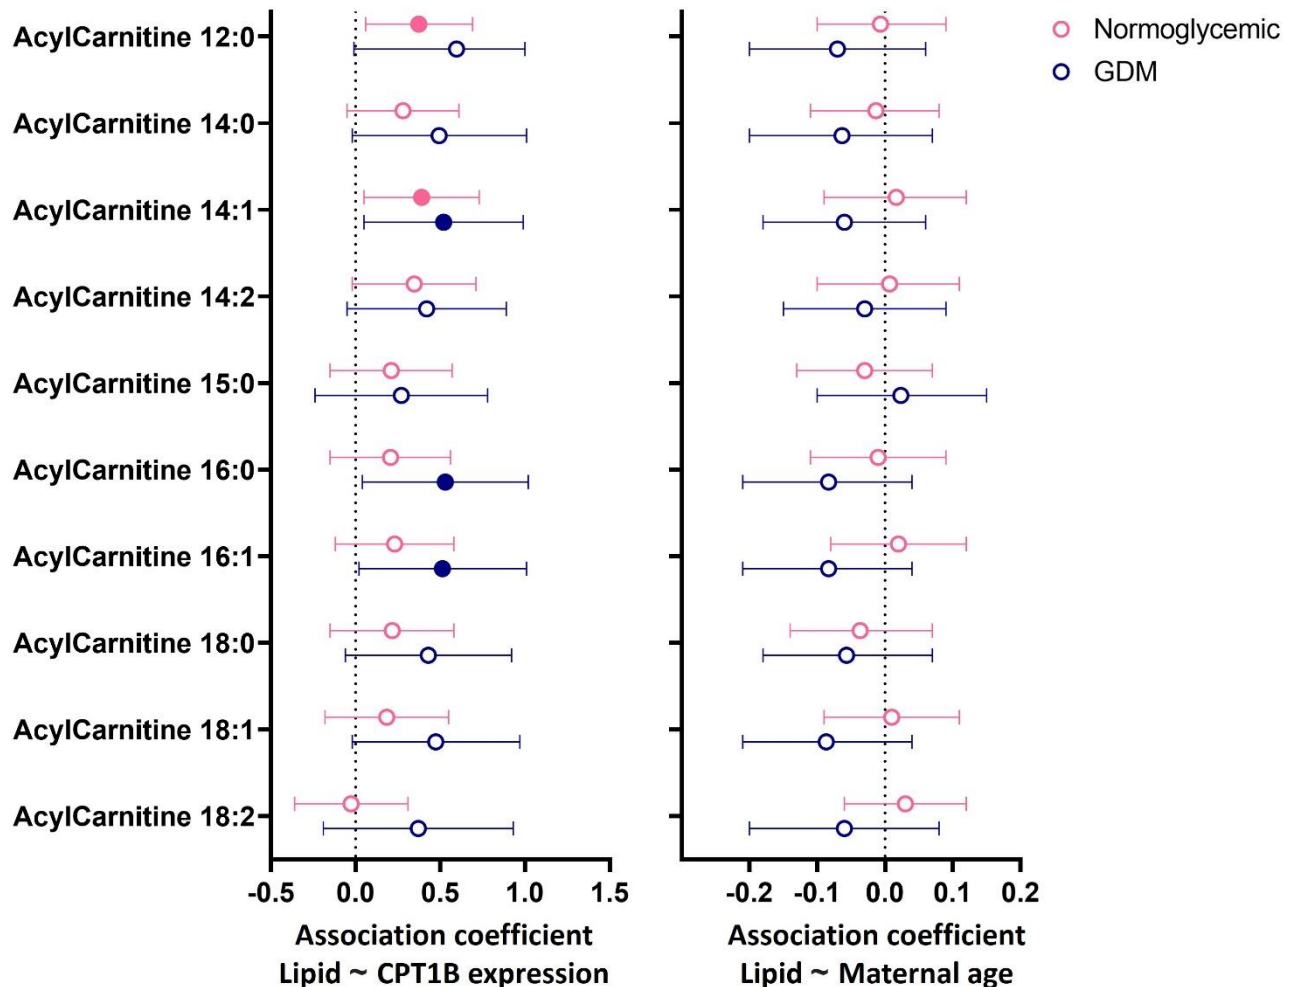

Supplement: Presentation_1.pdf [file Presentation_1.pdf]
